**A-811 Room 224-226, 10/18/2000 10:30 AM - 12:00 PM (PD)**  
**Single-Channel Basis for the Effect of Isoflurane on *Shaker* H4 IR Potassium Channels** Jichang Li, M.D., Ph.D.; Ana M. Correa, Ph.D., Dept. of Anesthesiology, UCLA, Los Angeles, CA., Single-channel and non-stationary noise analysis reveal larger single channel conductance and open probability of *Shaker* H4 IR K<sup>+</sup> channels exposed to isoflurane.

**A-812 Room 224-226, 10/18/2000 10:30 AM - 12:00 PM (PD)**  
**Reversal of General Anesthesia. Novel Theory and Application** Hiroshi Kamaya, M.D.; Tsuneo Tatara, M.D.; Issaku Ueda, M.D., Anesthesia Service-112A, VAMC, Salt Lake City, UT, United States. Pressure reversal of anesthesia implies that physically compressing the volume antagonizes anesthesia. We found that LFA decreased the volume of FFL. LFA successfully antagonized halothane anesthesia in goldfish.
